# Supplementary material
Source: MDPI journal article supplement (https://www.mdpi.com/2073-4344/11/11/1410)
Supplement: s1 [file s1]

## Supplementary Materials

# Application Potential of Cyanide Hydratase from *Exidia Glandulosa*: Free Cyanide Removal from Simulated Industrial Effluents

Anastasia Sedova <sup>1,2</sup>, Lenka Rucká <sup>1</sup>, Pavla Bojarová <sup>1,2</sup>, Michaela Glozlová <sup>1,2</sup>, Petr Novotný <sup>1</sup>, Barbora Křístková <sup>1,3</sup>, Miroslav Pátek <sup>1</sup> and Ludmila Martínková <sup>1,\*</sup>

<sup>1</sup> Institute of Microbiology of the Czech Academy of Sciences, Vídeňská 1083, CZ-142 20 Prague, Czech Republic; sedova\_aa@mail.ru (A.S.); rucka@biomed.cas.cz (L.R.); bojarova@biomed.cas.cz (P.B.); m.glozlova@gmail.com (M.G.); petr.novotny@biomed.cas.cz (P.N.); barbora.kristkova@biomed.cas.cz (B.K.); patek@biomed.cas.cz (M.P.)

<sup>2</sup> Department of Health Care Disciplines and Population Protection, Faculty of Biomedical Engineering, Czech Technical University in Prague, Nám. Sítná 3105, CZ-272 01 Kladno, Czech Republic

<sup>3</sup> Faculty of Food and Biochemical Technology, University of Chemistry and Technology, Prague, Technická 5, CZ-166 28 Prague, Czech Republic

\* Correspondence: martinko@biomed.cas.cz; Tel.: +420-296-442-569

## Contents:

**Figure S1.** Optimized sequence of the gene encoding NitEg.

**Figure S2.** (A) SDS-PAGE of purified NitEg. (B) Determination of enzyme molecular mass.

**Figure S3.** Shelf life of NitEg at pH 8.0 and 4 °C.

**Figure S4.** Multiple sequence alignment of NitEg (UniProtKB: A0A165HZS1) and its closest characterized homologue from *Neurospora crassa* (UniProtKB: Q7RVT0).

**Table S1.** Specific activities of cyanide hydratases.

**Table S2.** Purification of NitEg from 200 mL of culture.

**Table S3.** Performance of cyanide hydratase and cyanide dehydratase in model mixtures and effluents.

```

      M P I T K Y K A A A V T S E P G W F D L E G
1.  CATATGCCGATCACCAAGTACAAGGCCGCTGCTGACCTCTGAGCCAGGATGGTTGACCTCGAAGGC
   G V G K T I N F I N E A G G A G C K L V A F P
70.  GGCGTTTCAGAAGACGATCAACTTCATCAACGAAGCTGGCCAAGCGGGCTGCAAGCTTGTAGCCTTCCCC
   E V W I P G Y P Y W M W K V N Y Q Q S L P M L
139. GAAGTCTGGATCCCAGGCTATCCGTACTGGATGTGGAAGGTCAACTATCAGCAGTCCCTTCCCATGCTG
   K K Y R E N S L G V N T E E M R R I R R A A R
208. AAGAAGTATCGCGAGAACTCCCTCGGAGTCAACACGGAGGAAATGAGACGCATCCGCCGCGCGCGCGC
   D N Q I Y V S M G F S E I D H A T L Y L A Q V
277. GACAACCAGATCTACGTCTCGATGGGCTTCTCCGAGATCGACCACGCGACGTTGTACCTAGCGCAGGTC
   L I S P T G E V I N H R R K I K P T H V E K L
346. CTCATCTCTCCGACGGGCGAGGTGATCAACCACAGACGCAAGATCAAGCGGACGCACGTCGAGAACTC
   V Y G D G A G D T F L S V T E T D I G R L G Q
415. GTCTACGGCGACGGCGCAGGCGACACCTTCCTCTCCGTACAGAAACCGACATCGGACGGCTCGGGCAG
   L N C W E N M N P F L K A L N V S A G E Q V H
484. CTGAAGTGTGGGAGAACATGAACCCGTTCTCAAGGCCCTGAACGTCTCCGCCGAGAGCAGGTGCAC
   V A A W P V Y P G K E T L K Y P D P A T N V A
553. GTCGCCGCGTGGCCGGTGTACCTGGCAAGGAGACGCTCAAGTATCCCGACCCCGGACGAACGTGGCC
   E P A S D L V T P A Y A I E T G T W T L A P F
622. GAGCCCCGCTCCGACCTCGTTACGCCCGCTTATGCGATTGAGACCGGCACGTGGACTCTCGCGCCGTTCT
   Q R L S K E G L K K N T P E G V E P E T D P S
691. CAGCGCCTGAGTAAGGAGGGCTTGAAGAAGAACACGCCCGAGGGAGTCGAACCTGAGACGGATCCCAGC
   T Y N G H A R I F A P D G T L L V K P D K D F
760. ACGTACAACGGCCACGCGCGCATCTTCGCGCCCGACGGTACGCTGCTCGTCAAGCCGGACAAGGACTTC
   D G L L F V N I D L N E C H L T K A L A D F G
829. GACGGGCTGCTCTTCGTCAACATCGACCTCAACGAGTGCCACCTTACTAAGGCTCTCGCTGACTTCGGC
   G H Y M R P D L I R L L V D T R R K E L V T E
898. GGCCACTATATGCGTCCGGACCTCATCCGTCTGCTTGTCGACACGCGCGCAAGGAACCTCGTGACAGAA
   A D P D G G I A T Y T T R E R L G L N L P L A
967. GCGGACCCAGACGGCGGCATTGCCACCTACACCACGCGCAACGGCTTGGCCTGAACTTGCCATTGGCG
   E K E E K K G G S S T K K H D G K K A G D L
1036. GAGAAGGAGGAGAAGAAGGGTGGGAGCAGCACCAAGAAGCACGATGGGAAGAAAGCTGGCGACCTCCTC
1105. GAG

```

**Figure S1.** Optimized sequence of *cynH* gene from *Exidia glandulosa*. Gene optimization in terms of *E. coli* codon usage and optimized gene synthesis were carried out by GeneArt (ThermoFisher), Regensburg, Germany.

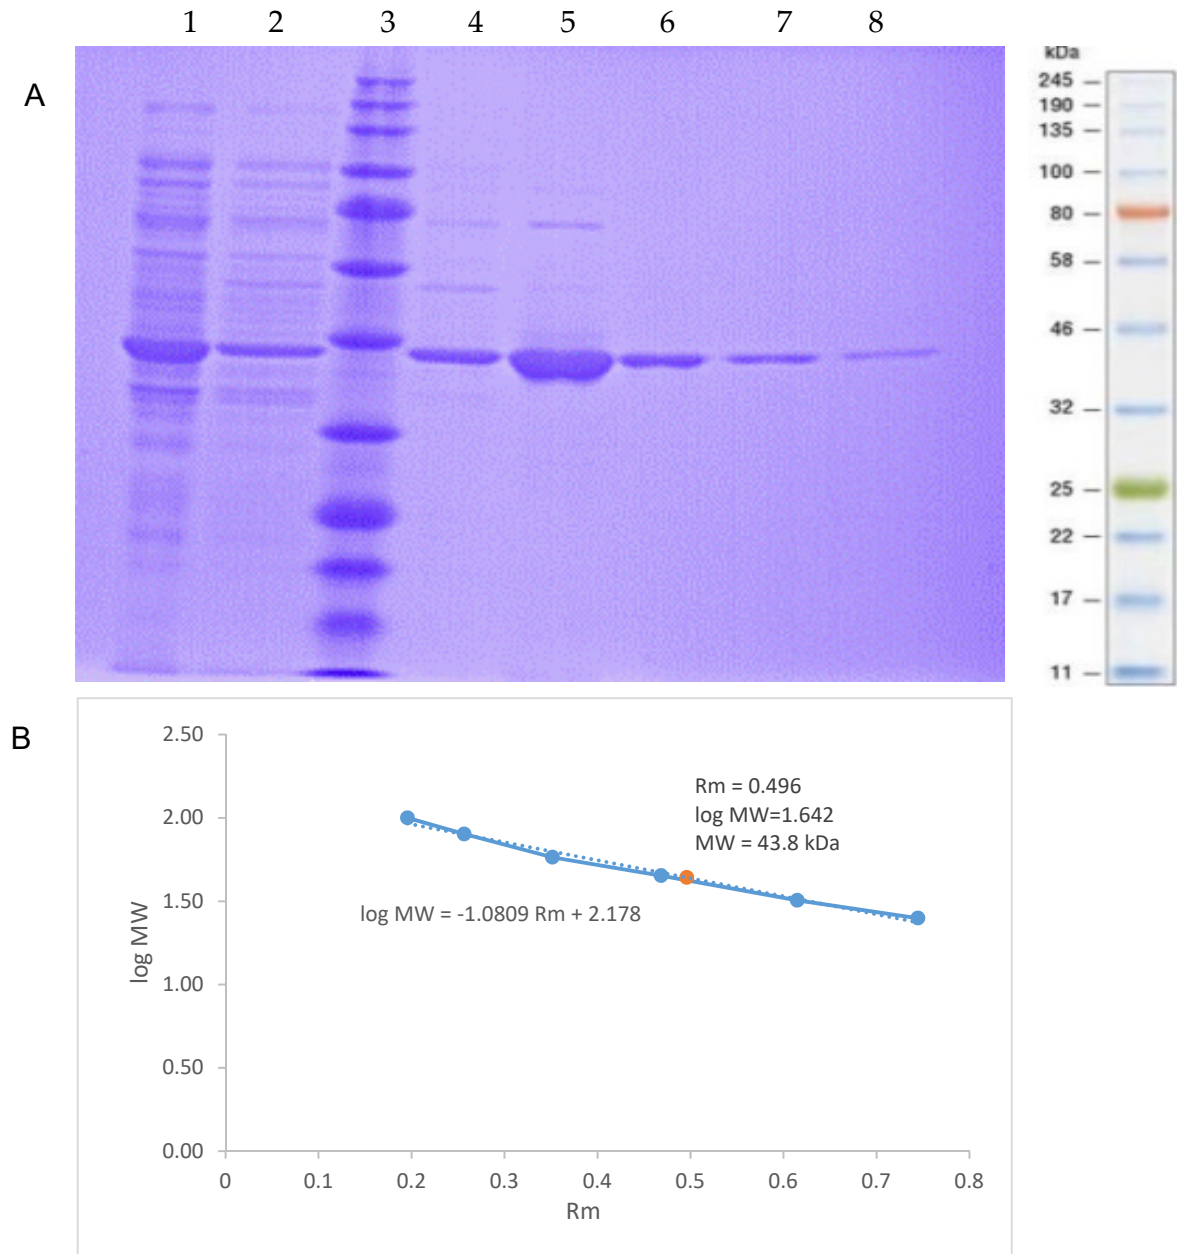

**Figure S2. (A)** Left, SDS-PAGE of NitEg in 10% polyacrylamide gels. (1) Cell-free extract, (2) column wash, (3) marker, (4-8) fractions from cobalt-affinity chromatography; Right, prestained marker; **(B)** Determination of molecular weight of NitEg (log MW = 1.642, MW = 43.85 kDa); MW = molecular weight; Rm, relative mobility = distance traveled by the protein/distance traveled by the dye front). The calibration curve (blue) was constructed for standard proteins within MW range of 25-100 kDa; NitEg in orange.

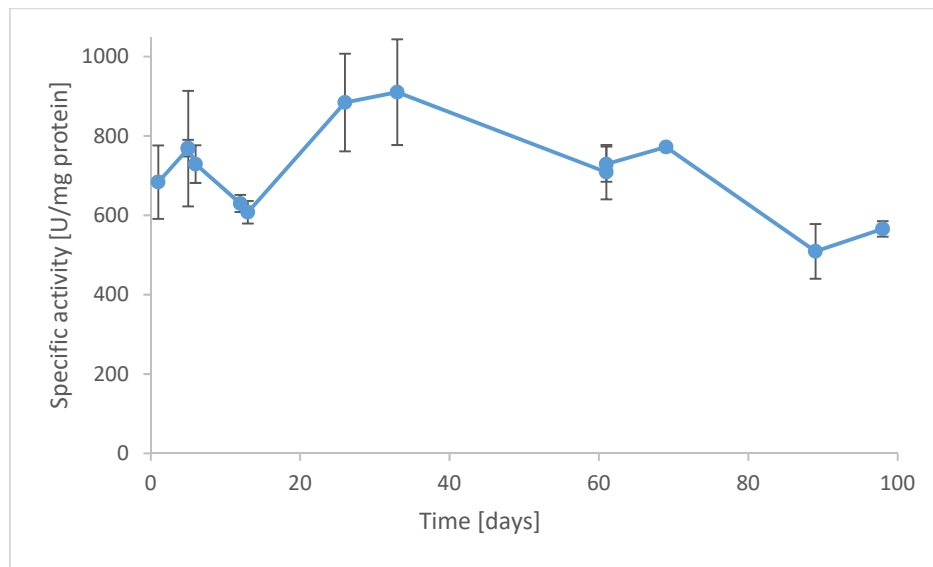

**Figure S3.** Shelf life of NitEg at pH 8.0 and 4 °C.



**Table S1.** Specific activities of cyanide hydratases

| Organism                      | Heterologous expression <sup>1</sup> | Specific activity <sup>2</sup> |                   |                 | Reference <sup>3</sup> |
|-------------------------------|--------------------------------------|--------------------------------|-------------------|-----------------|------------------------|
|                               |                                      | [U/mg dcw]                     | [U/mg protein]    |                 |                        |
|                               |                                      |                                | Cell-free extract | Purified enzyme |                        |
| <i>Gloeocercospora sorghi</i> | -                                    | 0.044                          | 23.3              | 555             | [22]                   |
| <i>Fusarium lateritium</i>    | -                                    | 102.5                          | 55.9              | 1109            | [23]                   |
|                               | +                                    | ≈ 600                          | n.d.              | n.d.            | [29]                   |
| <i>Fusarium solani</i>        | -                                    | 1.4                            | 4.6               | 128             | [24]                   |
| <i>Fusarium oxysporum</i>     | -                                    | n.d.                           | 85.0              | 840             | [25]                   |
| <i>Pyrenophora tritici</i>    | +                                    | n.d.                           | n.d.              | 185             | [31]                   |
| <i>Botryotinia fuckeliana</i> | +                                    | n.d.                           | n.d.              | 100             | [31]                   |
| <i>Stereum hirsutum</i>       | +                                    | 153                            | n.d.              | n.d.            | [32]                   |
| <i>Aspergillus niger</i>      | +                                    | 385                            | 736               | 1324            | [33]                   |

<sup>1</sup> in *Escherichia coli*<sup>2</sup> substrate KCN<sup>3</sup> see main text for references

dcw = dry cell weight; n.d. = not determined

**Table S2.** Purification of NitEg from 200 mL of culture

| Sample               | Volume<br>[mL] | Protein<br>[mg/ml] | Total<br>protein<br>[mg] | Specific<br>activity<br>[U/mg protein] | Total<br>activity<br>[U] | Purification<br>(fold) | Yield<br>[%] |
|----------------------|----------------|--------------------|--------------------------|----------------------------------------|--------------------------|------------------------|--------------|
| Cell-free<br>extract | 23             | 9.3±0.1            | 214±2                    | 280±14                                 | ≈ 59,920                 | -                      | -            |
| Purified<br>enzyme   | 1.2            | 10.3±0.3           | 12.4±0.4                 | 697±95 <sup>a</sup>                    | ≈ 8,643                  | ≈ 2.5                  | ≈14.4        |

Activities were determined by picric acid method.

**Table S3.** Performance of cyanide hydratase and cyanide dihydratase in model mixtures and real effluents

| Reaction mixture,<br>fCN concentration, pH           | Biocatalyst                                     | Removal<br>(Time) | Reference <sup>1</sup> |
|------------------------------------------------------|-------------------------------------------------|-------------------|------------------------|
| Buffer, 0.6 mM, pH 9.0                               | NitEg <sup>2</sup>                              | 100% (10 min)     | This work              |
| Buffer, 4.5 mM, pH 9.0                               |                                                 | 100% (30 min)     |                        |
| Buffer, 25 mM, pH 9.0                                |                                                 | 100% (20 min)     |                        |
| Buffer, 25 mM, pH 9.5                                |                                                 | 100% (45 min)     |                        |
| Buffer, 25 mM, pH 10.0                               |                                                 | 83% (1 h)         |                        |
| Buffer, 25 mM, pH 10.5                               |                                                 | 22% (1 h)         |                        |
| Buffer, 100 mM, pH 9.0                               |                                                 | 98% (2 h)         |                        |
| Buffer, 100 mM, pH 8.0                               | CynH ( <i>N. crassa</i> ) <sup>2</sup>          | 100% (1 h)        | [3]                    |
| Buffer, 10 mM, pH 8.0                                | CynH ( <i>A. niger</i> ) <sup>2</sup>           | 100% (5 min)      | [4]                    |
| Coking effluent, simulated,<br>0.6 mM, pH 9.0        | NitEg <sup>b</sup>                              | 100% (1.5 h)      | This work              |
| Mine effluent, 528 mM, pH 11                         | CynD ( <i>B. pumilus</i> )<br>immobilized cells | 43% (4 h)         | [2]                    |
| Mine effluent, 17.6 mM, -                            |                                                 | 98% (4 h)         |                        |
| Petrochemical effluent,<br>simulated, 4.6 mM, pH 9.1 | NitEg <sup>2</sup>                              | 96% (45 min)      | This work              |
| Cu-plating effluent, simulated,<br>100 mM, pH 9.0    |                                                 | 96% (2 h)         |                        |
| Ag-plating effluent, simulated,<br>100 mM, pH 9.0    |                                                 | 98 (2 h)          |                        |
| Cu-plating effluent, diluted,<br>100 mM, pH 8.0      | CynH ( <i>N. crassa</i> ) <sup>2</sup>          | ≈ 65% (12 h)      | [3]                    |
| Ag-plating effluent, diluted,<br>100 mM, pH 8.0      |                                                 | ≈ 90 (2 h)        |                        |

<sup>1</sup> see main text for references

<sup>2</sup> purified
